# Supplementary material for: The Use of Automated Bioacoustic Recorders to Replace Human Wildlife Surveys: An Example Using Nightjars
Source: PubMed Central journal article supplement (PMC4100896; doi:10.1371/journal.pone.0102770), 2014-07-16

## A. Slaley Forest

- Location of recorder
- Survey route

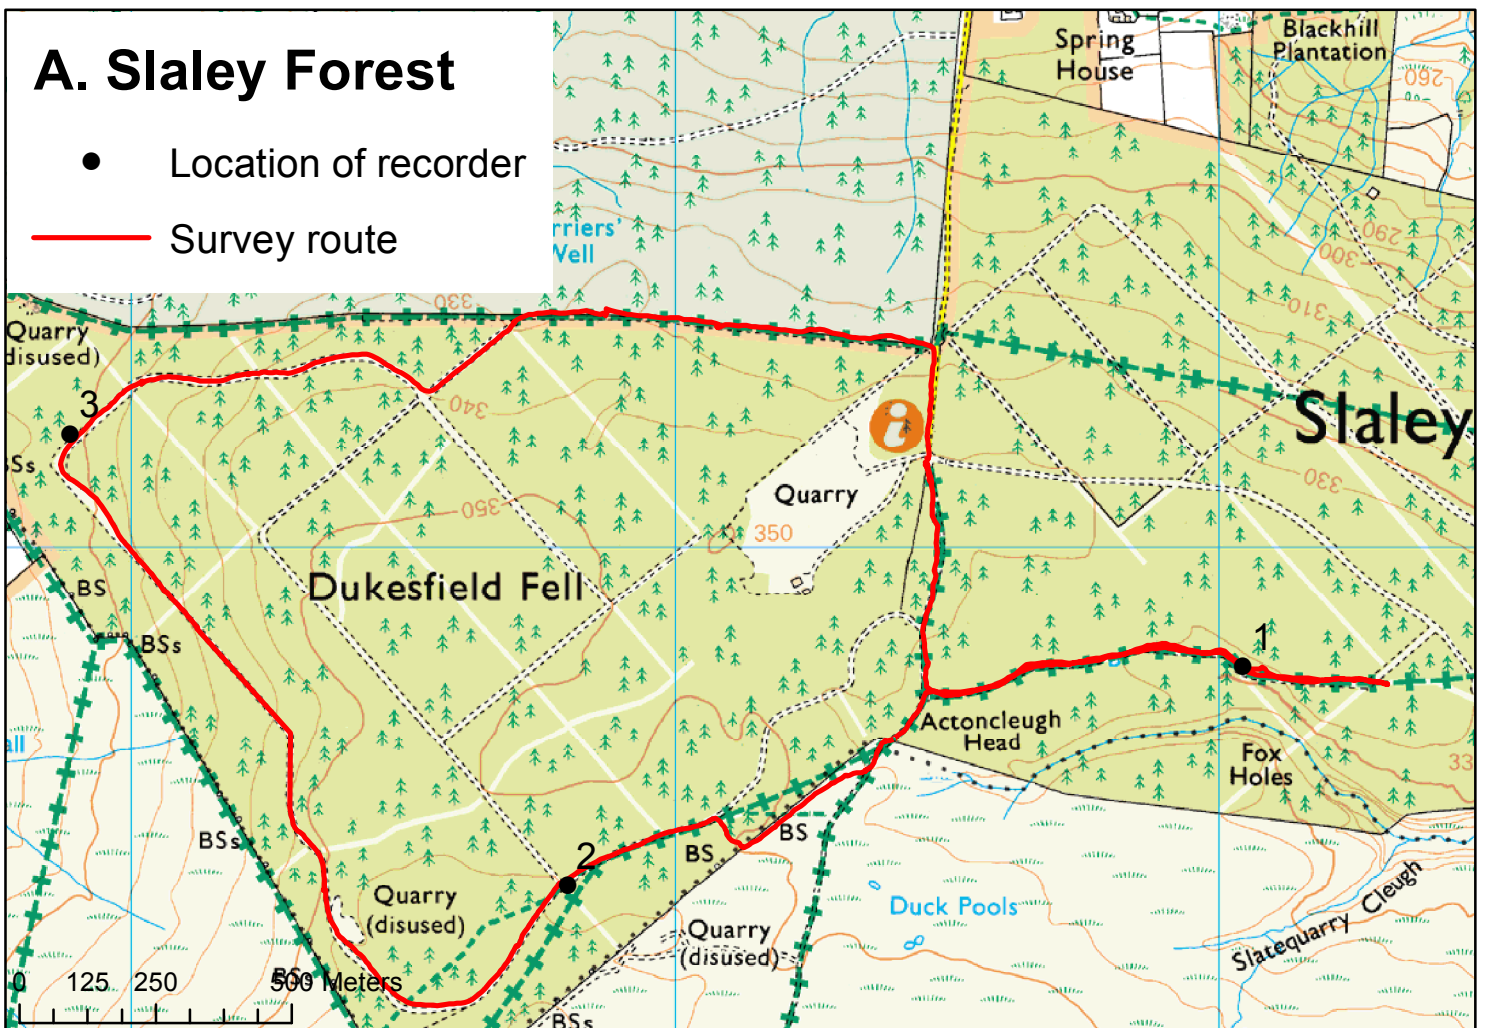

## B. Fowlaws

- Location of recorder
- Survey route

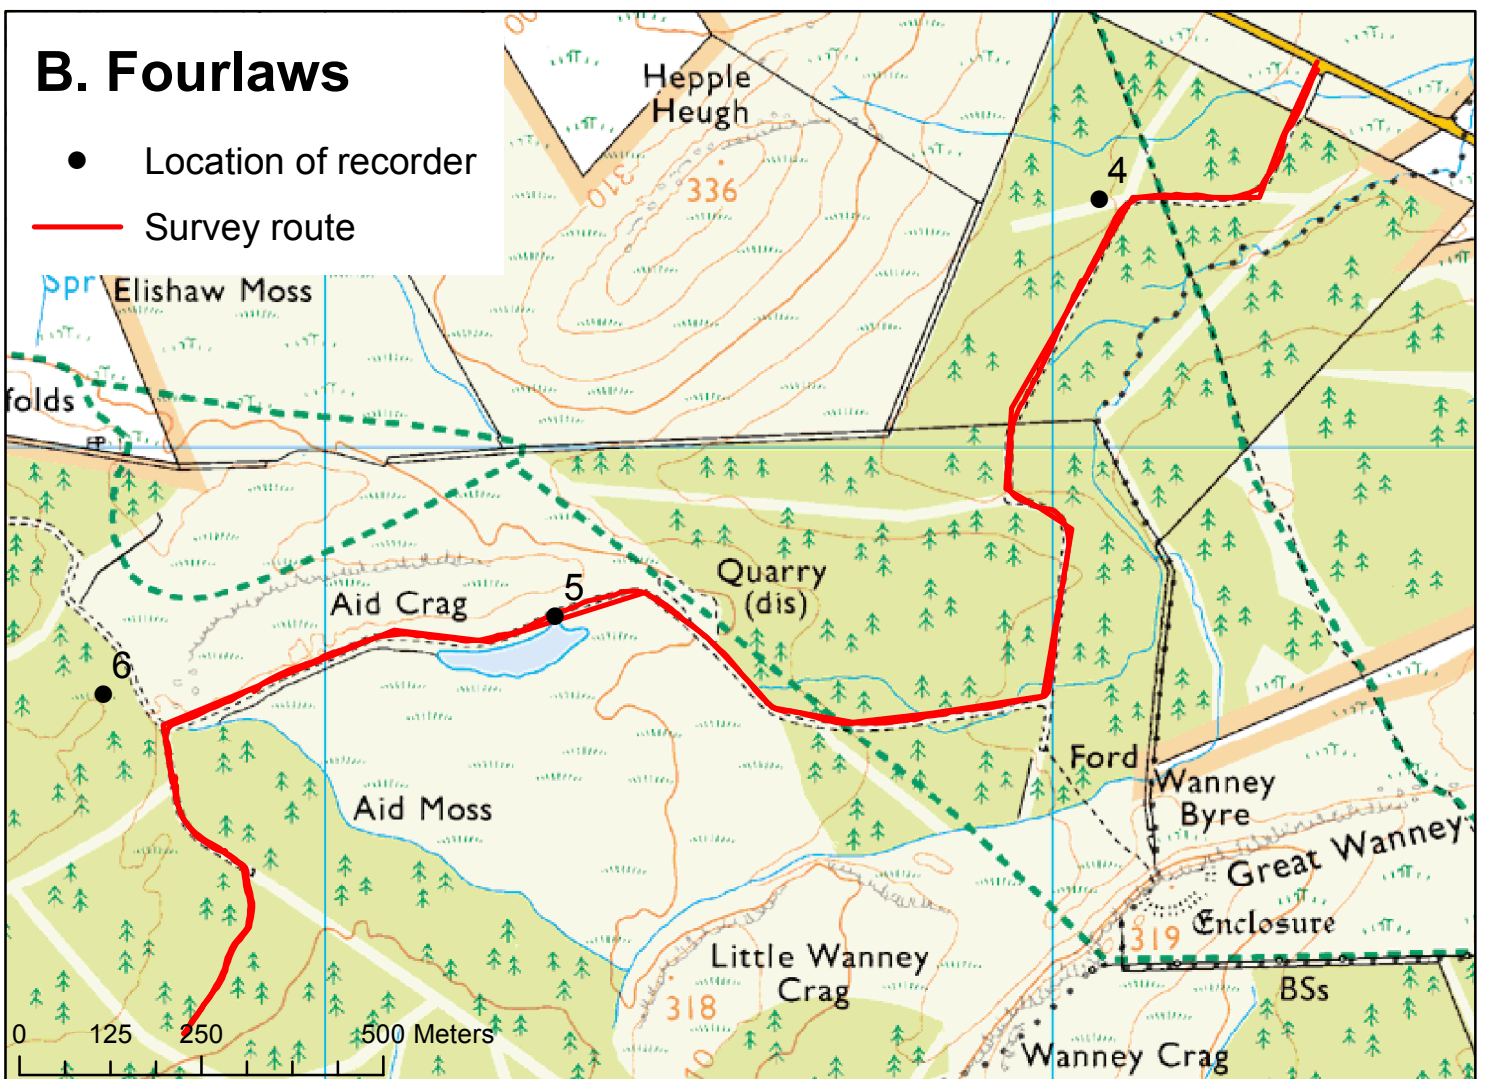

Supplement: pone.0102770.s001.pdf [file pone.0102770.s001.pdf]
